# Supplementary material for: Infiltration of Proinflammatory M1 Macrophages into the Outer Retina Precedes Damage in a Mouse Model of Age-Related Macular Degeneration
Source: Hindawi journal article supplement (doi:10.1155/2013/503725), 2013-01-01
Supplement: f1 [file 503725.f1.pdf]

**Supplementary Figures for:**

**Infiltration of Pro-Inflammatory M1 Macrophages Into the Outer Retina Precedes Damage  
in a Mouse Model of Age-Related Macular Degeneration**

*Fernando Cruz-Guilloty<sup>a,b</sup>, Ali M. Saeed<sup>a</sup>, Jose J. Echegaray<sup>a</sup>, Stephanie Duffort<sup>a</sup>, Asha Ballmick<sup>a</sup>, Yaohong Tan<sup>a</sup>, Michel Betancourt<sup>a</sup>, Eduardo Viteri<sup>a</sup>, Ghansham C. Ramkellawan<sup>a</sup>, Eric Ewald<sup>a</sup>, William Feuer<sup>a</sup>, DeQiang Huang<sup>a</sup>, Rong Wen<sup>a</sup>, Li Hong<sup>c</sup>, Hua Wang<sup>c</sup>, James M. Laird<sup>c</sup>, Abdoulaye Sene<sup>d</sup>, Rajendra S. Apte<sup>d</sup>, Robert G. Salomon<sup>c</sup>, Joe G. Hollyfield<sup>e</sup> and Victor L. Perez<sup>a,b</sup>*

<sup>a</sup>Bascom Palmer Eye Institute, Department of Ophthalmology, University of Miami Miller School of Medicine, Miami, FL, USA 33136

<sup>b</sup>Department of Microbiology and Immunology, University of Miami Miller School of Medicine, Miami, FL, USA 33136

<sup>c</sup>Department of Chemistry, Case Western Reserve University, Cleveland, OH, USA 44106

<sup>d</sup>Department of Ophthalmology and Visual Sciences, Washington University School of Medicine, St. Louis, Missouri, USA. 63110

<sup>e</sup>Cole Eye Institute, Department of Ophthalmology, Cleveland Clinic Lerner College of Medicine, Cleveland, OH, USA 44195

**Corresponding author:** Victor L. Perez, Associate Professor, Ophthalmology, Immunology & Microbiology, University of Miami Miller School of Medicine, Bascom Palmer Eye Institute, Miami, FL, USA 33136. [Vperez4@med.miami.edu](mailto:Vperez4@med.miami.edu)

## BALB/c late time pathology (d450 p.i.)

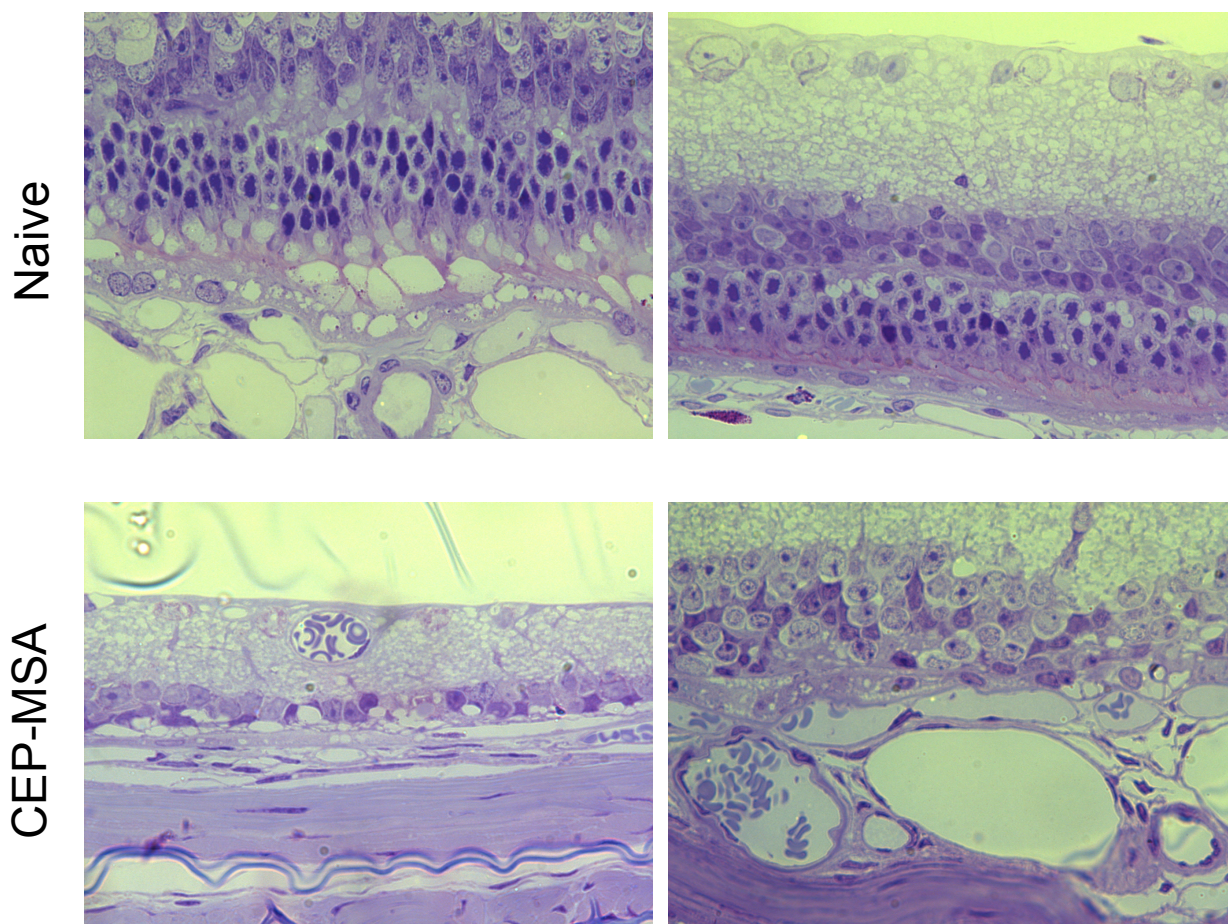

**Suppl. Fig. 1.** *Age-related retinal degeneration in BALB/c mice is exacerbated by CEP-MSA immunization.* Naïve BALB/c mice present obvious signs of outer retinal degeneration by ~18 months of age, such as reduced density of photoreceptor cell nuclei and thinning of the rod outer segment. However, pathology in age-matched CEP-MSA-immunized mice is more severe, with signs of geographic atrophy, areas of complete loss of the photoreceptor cells and possible signs of choroidal neovascularization. Representative images from 3-5 mice per group are shown.

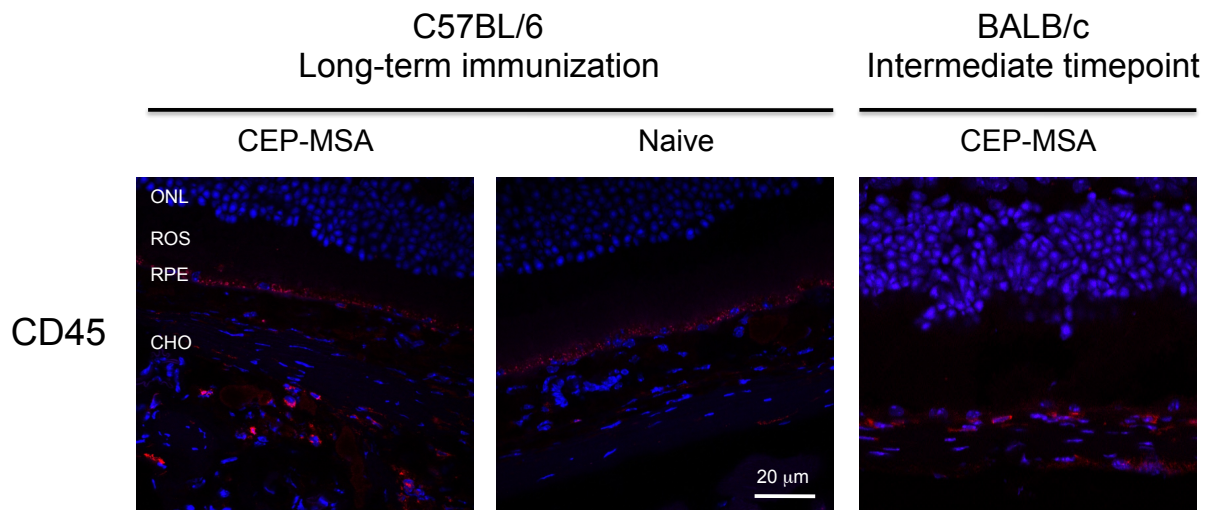

**Suppl. Fig. 2.** *Inflammatory cells surround the retinas of CEP-MSA immunized mice.* Anti-CD45 stains of frozen sections show the presence of increased numbers of inflammatory cells in the choroid of immunized mice in the B6 background, relative to age-matched naïve mice. Similar data is observed in the BALB/c mice, even at earlier time-points. INL, inner nuclear layer; ONL, outer nuclear layer; ROS, rod outer segment; RPE, retinal pigment epithelium; CHO, choroid. The scale marker represents a 20  $\mu\text{m}$  length.

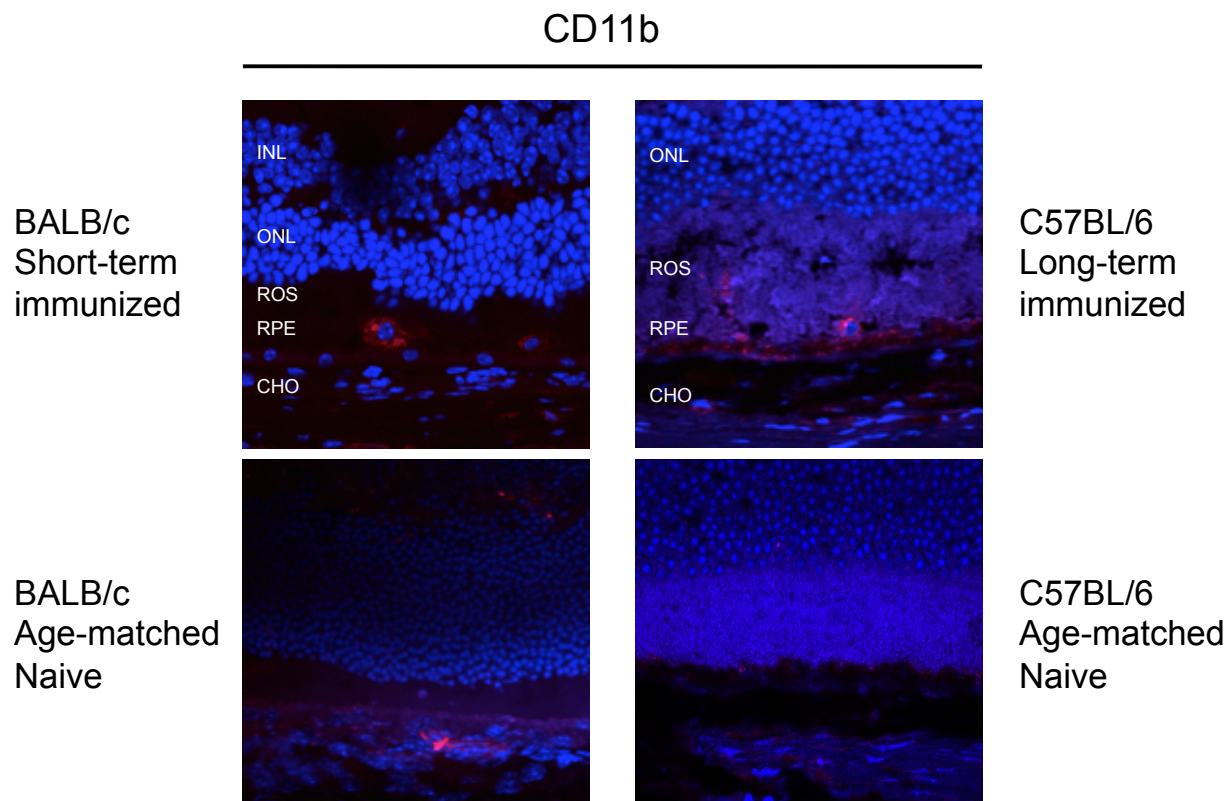

**Suppl. Fig. 3.** *Retinal CD11b<sup>+</sup> macrophages in CEP-MSA-immunized mice.* Anti-CD11b was used to stain frozen sections of eyes from CEP-MSA immunized BALB/c mice at d40-100 p.i., C57BL/6 mice at d200+ p.i. or age-matched naïve controls. Even though naïve mice show macrophage-like cells in the ROS/RPE region by histology, these cells are not CD11b positive. On the other hand, CEP-MSA-immunized mice contain CD11b<sup>+</sup> cells in the relevant regions, with BALB/c mice showing infiltration at early time points. Representative images from 3-5 mice per group are shown. INL, inner nuclear layer; ONL, outer nuclear layer; ROS, rod outer segment; RPE, retinal pigment epithelium; CHO, choroid.
